# Supplementary material for: TRIM24 is an insulin-responsive regulator of P-bodies
Source: PubMed Central journal article supplement (PMC9270398; doi:10.1038/s41467-022-31735-0), 2022-07-08
Supplement: 41467_2022_31735_MOESM2_ESM.pdf [file 41467_2022_31735_MOESM2_ESM.pdf]

## **Description of Additional Supplementary Files**

### **Supplementary Data 1 Proteins identified in the PAS immunoprecipitates from mouse liver lysates**

PAS-reactive phosphorylated proteins were immunoprecipitated from mouse liver lysates using the PAS antibody. The immunoprecipitated proteins were electrophoretically separated via SDS-PAGE, and stained with Coomassie blue dye. Immunoprecipitated proteins were excised and subjected to identification via mass-spectrometry. Proteins that had at least two unique peptides identified were considered as positive hits.

### **Supplementary Data 2 P-body components identified in the immunoprecipitates of GFP-TRIM24**

GFP-TRIM24 was expressed in HEK293 cells, and immunoprecipitated from cell lysates using the GFP-Trap®-agarose. Immunoprecipitates were separated via SDS-PAGE, stained with Coomassie blue dye, and subjected to identification via mass-spectrometry. Proteins that had at least two unique peptides identified were considered as positive hits. P-body components identified in the GFP-TRIM24 immunoprecipitates are listed.

### **Supplementary Data 3 Differentially-expressed genes in the liver of HFD-fed TRIM24<sup>C52/55A</sup> mice**

Deep sequencing of RNA (RNA-Seq) was performed in the liver of HFD-fed WT and TRIM24<sup>C52/55A</sup> mice. Genes with differential expression are listed in this table.
