# Supplementary material for: TRIM24 is an insulin-responsive regulator of P-bodies
Source: PubMed Central journal article supplement (PMC9270398; doi:10.1038/s41467-022-31735-0), 2022-07-08
Supplement: 41467_2022_31735_MOESM6_ESM.pdf [file 41467_2022_31735_MOESM6_ESM.pdf]

Corresponding author(s): Shuai ChenLast updated by author(s): Jun 19, 2022

## Reporting Summary

Nature Portfolio wishes to improve the reproducibility of the work that we publish. This form provides structure for consistency and transparency in reporting. For further information on Nature Portfolio policies, see our [Editorial Policies](#) and the [Editorial Policy Checklist](#).

### Statistics

For all statistical analyses, confirm that the following items are present in the figure legend, table legend, main text, or Methods section.

n/a Confirmed

- |                                     |                                     |                                                                                                                                                                                                                                                            |
|-------------------------------------|-------------------------------------|------------------------------------------------------------------------------------------------------------------------------------------------------------------------------------------------------------------------------------------------------------|
| <input type="checkbox"/>            | <input checked="" type="checkbox"/> | The exact sample size ( $n$ ) for each experimental group/condition, given as a discrete number and unit of measurement                                                                                                                                    |
| <input type="checkbox"/>            | <input checked="" type="checkbox"/> | A statement on whether measurements were taken from distinct samples or whether the same sample was measured repeatedly                                                                                                                                    |
| <input type="checkbox"/>            | <input checked="" type="checkbox"/> | The statistical test(s) used AND whether they are one- or two-sided<br><i>Only common tests should be described solely by name; describe more complex techniques in the Methods section.</i>                                                               |
| <input type="checkbox"/>            | <input checked="" type="checkbox"/> | A description of all covariates tested                                                                                                                                                                                                                     |
| <input type="checkbox"/>            | <input checked="" type="checkbox"/> | A description of any assumptions or corrections, such as tests of normality and adjustment for multiple comparisons                                                                                                                                        |
| <input type="checkbox"/>            | <input checked="" type="checkbox"/> | A full description of the statistical parameters including central tendency (e.g. means) or other basic estimates (e.g. regression coefficient) AND variation (e.g. standard deviation) or associated estimates of uncertainty (e.g. confidence intervals) |
| <input type="checkbox"/>            | <input checked="" type="checkbox"/> | For null hypothesis testing, the test statistic (e.g. $F$ , $t$ , $r$ ) with confidence intervals, effect sizes, degrees of freedom and $P$ value noted<br><i>Give <math>P</math> values as exact values whenever suitable.</i>                            |
| <input checked="" type="checkbox"/> | <input type="checkbox"/>            | For Bayesian analysis, information on the choice of priors and Markov chain Monte Carlo settings                                                                                                                                                           |
| <input checked="" type="checkbox"/> | <input type="checkbox"/>            | For hierarchical and complex designs, identification of the appropriate level for tests and full reporting of outcomes                                                                                                                                     |
| <input checked="" type="checkbox"/> | <input type="checkbox"/>            | Estimates of effect sizes (e.g. Cohen's $d$ , Pearson's $r$ ), indicating how they were calculated                                                                                                                                                         |

*Our web collection on [statistics for biologists](#) contains articles on many of the points above.*

### Software and code

Policy information about [availability of computer code](#)

Data collection

Data analysis

For manuscripts utilizing custom algorithms or software that are central to the research but not yet described in published literature, software must be made available to editors and reviewers. We strongly encourage code deposition in a community repository (e.g. GitHub). See the Nature Portfolio [guidelines for submitting code & software](#) for further information.

### Data

Policy information about [availability of data](#)

All manuscripts must include a [data availability statement](#). This statement should provide the following information, where applicable:

- Accession codes, unique identifiers, or web links for publicly available datasets
- A description of any restrictions on data availability
- For clinical datasets or third party data, please ensure that the statement adheres to our [policy](#)

The proteomic data generated in this study have been deposited in the MassIVE Repository (University of California, San Diego) under accession code (<ftp://massive.ucsd.edu/MSV000087849/> and <ftp://massive.ucsd.edu/MSV000087850/>). The RNA-Seq data generated in this study have been deposited in the NCBI database under accession code (<https://www.ncbi.nlm.nih.gov/geo/query/acc.cgi?acc=GSE193774>). All supplementary and unprocessed data generated in this study are provided in the Supplementary information/Source Data file.

## Field-specific reporting

Please select the one below that is the best fit for your research. If you are not sure, read the appropriate sections before making your selection.

- Life sciences       Behavioural & social sciences       Ecological, evolutionary & environmental sciences

For a reference copy of the document with all sections, see [nature.com/documents/nr-reporting-summary-flat.pdf](https://www.nature.com/documents/nr-reporting-summary-flat.pdf)

## Life sciences study design

All studies must disclose on these points even when the disclosure is negative.

|                 |                                                                                                                                                                                                                                                                                                                              |
|-----------------|------------------------------------------------------------------------------------------------------------------------------------------------------------------------------------------------------------------------------------------------------------------------------------------------------------------------------|
| Sample size     | No statistical methods were used to predetermine sample size due to the nature of this study. The sample size follows common standards employing three or more biological replicates, which is based on extensive laboratory experience and literature in the field. Sample size is reported in the legends for all figures. |
| Data exclusions | No data were excluded from the analysis.                                                                                                                                                                                                                                                                                     |
| Replication     | Results shown in the manuscript are representative of at least two independent experiments except the proteomics and RNA-Seq studies.                                                                                                                                                                                        |
| Randomization   | Samples were randomly allocated into experimental group.                                                                                                                                                                                                                                                                     |
| Blinding        | The investigators were blinded to group allocation during data collection and analysis.                                                                                                                                                                                                                                      |

## Reporting for specific materials, systems and methods

We require information from authors about some types of materials, experimental systems and methods used in many studies. Here, indicate whether each material, system or method listed is relevant to your study. If you are not sure if a list item applies to your research, read the appropriate section before selecting a response.

### Materials & experimental systems

### Methods

| n/a                                 | Involved in the study                                           | n/a                                 | Involved in the study                           |
|-------------------------------------|-----------------------------------------------------------------|-------------------------------------|-------------------------------------------------|
| <input type="checkbox"/>            | <input checked="" type="checkbox"/> Antibodies                  | <input checked="" type="checkbox"/> | <input type="checkbox"/> ChIP-seq               |
| <input type="checkbox"/>            | <input checked="" type="checkbox"/> Eukaryotic cell lines       | <input checked="" type="checkbox"/> | <input type="checkbox"/> Flow cytometry         |
| <input checked="" type="checkbox"/> | <input type="checkbox"/> Palaeontology and archaeology          | <input checked="" type="checkbox"/> | <input type="checkbox"/> MRI-based neuroimaging |
| <input type="checkbox"/>            | <input checked="" type="checkbox"/> Animals and other organisms |                                     |                                                 |
| <input checked="" type="checkbox"/> | <input type="checkbox"/> Human research participants            |                                     |                                                 |
| <input checked="" type="checkbox"/> | <input type="checkbox"/> Clinical data                          |                                     |                                                 |
| <input checked="" type="checkbox"/> | <input type="checkbox"/> Dual use research of concern           |                                     |                                                 |

## Antibodies

|                 |                                                                                                                                                                                                                                                                                                                                                                                                                                                                                                                                                                                                                                                                                                                                                                                                                                                                                                                                                                                                                                                                                                                                                                                                                                                                                                                                                                                                                                                                                                                                                                                                                                                         |
|-----------------|---------------------------------------------------------------------------------------------------------------------------------------------------------------------------------------------------------------------------------------------------------------------------------------------------------------------------------------------------------------------------------------------------------------------------------------------------------------------------------------------------------------------------------------------------------------------------------------------------------------------------------------------------------------------------------------------------------------------------------------------------------------------------------------------------------------------------------------------------------------------------------------------------------------------------------------------------------------------------------------------------------------------------------------------------------------------------------------------------------------------------------------------------------------------------------------------------------------------------------------------------------------------------------------------------------------------------------------------------------------------------------------------------------------------------------------------------------------------------------------------------------------------------------------------------------------------------------------------------------------------------------------------------------|
| Antibodies used | <p>anti-TRIM24(Proteintech, Cat No: 14208, dilution:1:1000)<br/> anti-GAPDH (Proteintech, Cat No: 60004-1, dilution:1:1000)<br/> anti-GFP (Santa Cruz Biotechnology, Cat No: sc-9996, dilution:1:1000)<br/> anti-c-Myc (Santa Cruz Biotechnology, Cat No: sc-40, dilution:1:1000)<br/> anti-EDC4 (Santa Cruz Biotechnology, Cat No: sc-376382, dilution:1:1000)<br/> anti-eIF2C/AGO1-4 (Santa Cruz Biotechnology, Cat No: sc-376696, dilution:1:1000)<br/> anti-LSM1 (Santa Cruz Biotechnology, Cat No: sc-373685, dilution:1:1000)<br/> anti-GW182 (Santa Cruz Biotechnology, Cat No: sc-56314, dilution:1:1000)<br/> anti-SCD1 (Santa Cruz Biotechnology, Cat No: sc-81776, dilution:1:1000)<br/> anti-DCP1 (Santa Cruz Biotechnology, Cat No: sc-100706, dilution:1:1000)<br/> anti-RCK (Santa Cruz Biotechnology, Cat No: sc-376433, dilution:1:1000)<br/> anti-SREBP1 (Santa Cruz Biotechnology, Cat No: sc-13551, dilution:1:1000)<br/> anti-PPAR<math>\alpha</math>(Santa Cruz Biotechnology, Cat No: sc-9000, dilution:1:1000)<br/> anti-Tubulin (Bioword, Cat No: BS1699, dilution:1:1000)<br/> anti-Lamin A/C (Abclonal, Cat No: A0249, dilution:1:1000)<br/> anti-FASN (Cell Signaling Technology, Cat No: 3189, dilution:1:1000)<br/> anti-ACC (Cell Signaling Technology, Cat No: 3676, dilution:1:1000)<br/> anti-PPAR<math>\gamma</math> (Cell Signaling Technology, Cat No: 2435, dilution:1:1000)<br/> anti-HA (Cell Signaling Technology, Cat No: 3724S, dilution:1:1000)<br/> anti-PKB (Cell Signaling Technology, Cat No: 9272, dilution:1:1000)<br/> anti-pS473-PKB (Cell Signaling Technology, Cat No: 9271, dilution:1:1000)</p> |
|-----------------|---------------------------------------------------------------------------------------------------------------------------------------------------------------------------------------------------------------------------------------------------------------------------------------------------------------------------------------------------------------------------------------------------------------------------------------------------------------------------------------------------------------------------------------------------------------------------------------------------------------------------------------------------------------------------------------------------------------------------------------------------------------------------------------------------------------------------------------------------------------------------------------------------------------------------------------------------------------------------------------------------------------------------------------------------------------------------------------------------------------------------------------------------------------------------------------------------------------------------------------------------------------------------------------------------------------------------------------------------------------------------------------------------------------------------------------------------------------------------------------------------------------------------------------------------------------------------------------------------------------------------------------------------------|

anti-pT308-PKB (Cell Signaling Technology, Cat No: 3038, dilution:1:1000)  
 anti-phospho-Akt substrate (PAS) antibody (Cell Signaling Technology, Cat No: 9611, dilution:1:1000)  
 anti-MTP (BD Transduction Laboratories™, Cat No: 612022, dilution:1:1000)  
 anti-pS1043-TRIM24 (customized at ABclonal, 1 ug/ml)

## Validation

Relevant data for validation of all primary antibodies for immunoblotting or immunofluorescence in this study are presented on the manufactures' websites. The PAS Sepharose beads, anti-Flag M2 Affinity Gel and GFP-Trap®-agarose were used for immunoprecipitation, with validation data shown on the manufactures' websites.

## Eukaryotic cell lines

Policy information about [cell lines](#)

## Cell line source(s)

Human embryonic kidney HEK293 cell was obtained from the Cell Resource Center, Chinese Academy of Medical Sciences and Peking Union Medical College (China).

## Authentication

Cell lines were not authenticated using STR profiling, Karyotyping, DNA barcoding, PCR assays with species-specific primers, etc technics. Cell lines were authenticated in our lab via routine observation of cell morphology under the microscope.

## Mycoplasma contamination

All cell lines were tested negative for mycoplasma contamination.

Commonly misidentified lines  
(See [ICLAC](#) register)

No commonly misidentified cell lines were used in the study.

## Animals and other organisms

Policy information about [studies involving animals](#); [ARRIVE guidelines](#) recommended for reporting animal research

## Laboratory animals

Mice (strain C57Bl/6J, both male and female) with age from 2 to 6 months were used in this study.

## Wild animals

The study did not involve wild animals.

## Field-collected samples

The study did not involve samples collected from the field.

## Ethics oversight

This study was approved by the Ethics Committee of Nanjing University complying with all relevant ethical regulations. All mouse procedures in this study were carried out under approval of the Institutional Animal Care and Use Committee (IACUC) at Model Animal Research Center of Nanjing University.

Note that full information on the approval of the study protocol must also be provided in the manuscript.
